# Supplementary material
Source: PubMed Central journal article supplement (PMC8716134)
Supplement: NIHMS1766127-supplement-Supplementary_Material.pdf [file NIHMS1766127-supplement-Supplementary_Material.pdf]

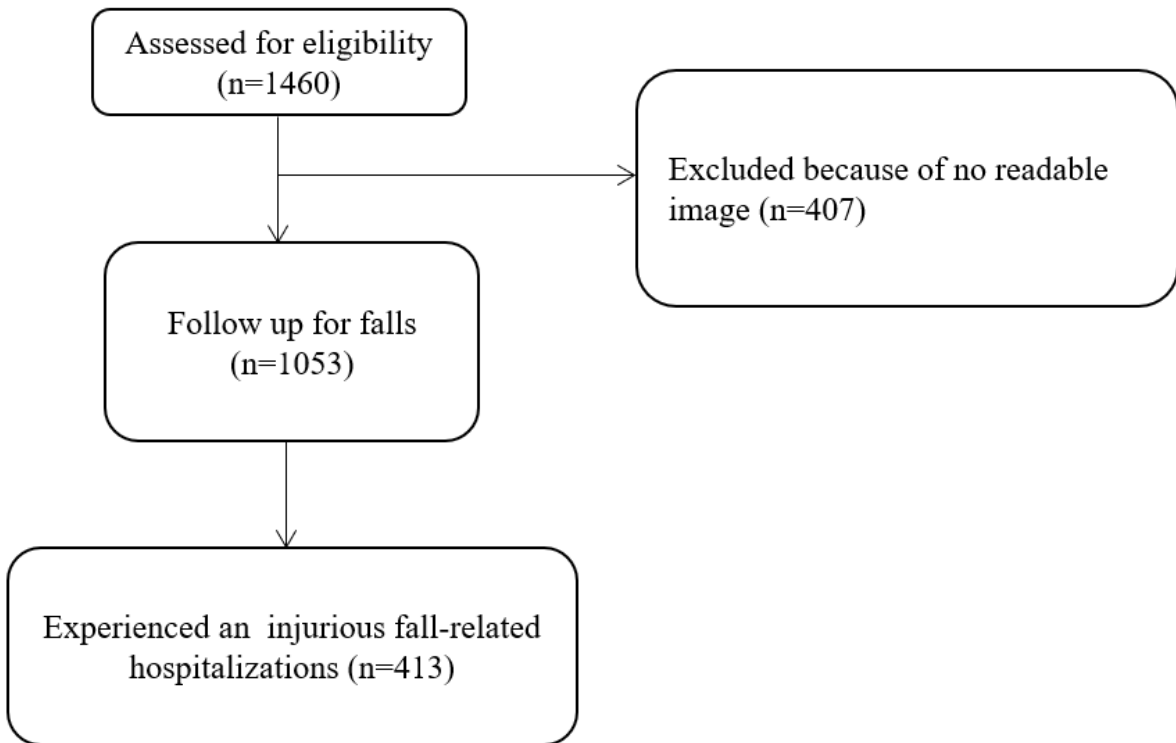

**Supplementary Figure 1:** Diagrammatic representation of the study design

**Supplementary Table 1** Multivariable-adjusted hazard ratios (HR) and 95%CI for fall-related hospitalizations over 14.5 years per unit increase in AAC24 with the inclusion of grip strength and TUG, individually and collectively

|                         | <b>HR(95%CI) per increase in AAC24</b> | <b>Significant covariates in the model</b>                  |
|-------------------------|----------------------------------------|-------------------------------------------------------------|
| Multivariable-adjusted  | <b>1.03 (1.01-1.07)</b>                | Age, prevalent (diabetes, ASVD and falls)                   |
| + Grip strength         | <b>1.04 (1.01-1.07)</b>                | Age, prevalent (diabetes, ASVD and falls) and grip strength |
| + TUG                   | <b>1.04 (1.01-1.07)</b>                | Age, prevalent (ASVD and falls) and TUG                     |
| + Grip strength and TUG | <b>1.04 (1.01-1.07)</b>                | Age, prevalent (ASVD and falls), grip strength and TUG      |

Bolded numbers indicate  $p < 0.05$ ; HR, Hazard ratio; TUG, Timed-up-and-go; Multivariable-adjusted for age, treatment code, BMI, prevalent ASVD, smoked ever, prevalent diabetes mellitus, statin use, blood pressure lowering medication use, socioeconomic status, physical activity and self-reported prevalent falls.
